# Supplementary material
Source: PubMed Central journal article supplement (PMC4588623)
Supplement: EC.00091-15_zek999094472so1.pdf [file EC.00091-15_zek999094472so1.pdf]

```

      480      490      500      510      520      543
scBro1  .....ALNDQKENVTKLNKSSLVAAASNSDEKLFACVKPHIVEINLLN.DNGKIWKKFD.DTK
hsALIX  FKERWQRTPSNELYKLRLEGTFNFTVLDKAVQADGQVRECYQSHRDITIVLLCKPEPELNAIIPSANPAK

      550      560      570      580      590      600      610
scBro1  NDKILLELLKQVKGHAEEDRTIKERFSRNLSERLDEINNDITIKLLI.IKNGKSDVELKDTFEVTEKFEF
hsALIX  TMQGSQVVNVLKSLLSNLDEVKKEREGLENDLKSIVN..FDLMSKFLTALAQDGVINEEALSVTEDRQVYG

      620      630      640      650      660      670      680
scBro1  LSIRIEATLYKQSSMTDDIKAKLDIIFHLNFKDKSSGEEKFLEDKKNFFDKLQEAVKSFISDLPKG
hsALIX  GLTKVQESLKKQEGLNKNIQVSHQEFKMKKQ.....SNNEANLREEVLKNLATAVDNFVELVANLKEG

      690      700
scBro1  IEFYDSLFNMSRDLAER.....
hsALIX  TKFYNEITTEILVRFQNKCSDIVFAR

```

Supple.Figure 1.

Amino acid alignments of sc Bro1 and hs Alix V domains  
according to Risler similarity scores matrices

Supplementary Table 1. Strains used in this study

| Name                | Genotype                                                                            | Source/Reference    |
|---------------------|-------------------------------------------------------------------------------------|---------------------|
| W303                | MAT $\alpha$ ade2-1 can1-100 his3-12,16 leu2-3,112 trp1-1 ura3-1                    | Rothstein           |
| Y795                | W303 $\alpha$ , $\Delta$ rfu1::KanMX $\Delta$ vps4::LEU2                            | Kimura et al., 2014 |
| Y1009               | W303 $\alpha$ ; RFU1-3xFLAG::RFU1                                                   | This study          |
| Y1119               | W303 $\alpha$ ; RFU1-3xFLAG::RFU1, $\Delta$ bro1::HIS3                              | This study          |
| Y1118               | W303 $\alpha$ , $\Delta$ rfu1::KanMX $\Delta$ vps4::LEU2, $\Delta$ bro1::HIS3       | This study          |
| Y1140               | W303 $\alpha$ ; $\Delta$ bro1::HIS3                                                 | This study          |
| rim101 $\Delta$ 101 | MAT $\alpha$ ura3-52 leu2 $\Delta$ 1 his3 $\Delta$ l200 rim101::HIS3                | This study          |
| FM201               | MAT $\alpha$ ura3-52 leu2 $\Delta$ 1 his3 $\Delta$ 200 trp1 $\Delta$ 63 rim20::HIS3 | Hayashi et al, 2005 |

Supplementary Table S2 Plasmids used in this study

| Plasmids | Name                             | Proteins expressed               | Characteristics | Source/References     |
|----------|----------------------------------|----------------------------------|-----------------|-----------------------|
| pGCU10   | GAL1p-GFP-tADH1                  | GFP                              | URA3, CEN       | Kimata et al., (1997) |
| E798     | YCplac22-RFU1p-RFU1-GFP          | Rfu1-GFP                         | TRP1, CEN       | This study            |
| E744     | pRFU1p-RFU1(1-200)-GFP           | RFU1(1-200)-GFP                  | URA3, CEN       | This study            |
| pMALP2X  | MBP                              | MBP                              |                 |                       |
| E382     | MBP-Rfu1(1-200)                  | MBP-Rfu1(1-200)                  |                 | Kimura et al., (2009) |
| E827     | MBP-RIM101(501-625)              | MBP-Rim101(501-625)              |                 | This study            |
|          | MBP-RIM101(501-625,Y620A, P621A) | MBP-Rim101(501-625,Y620A, P621A) |                 | This study            |
| pGEX4T-3 |                                  | GST                              |                 | GE                    |
| E779     | pGEX-Bro1-V Comp                 | GST-Bro1-V (361-720)             |                 | Kimura et al., (2014) |
| E831     | pGEX-Bro1-V Comp(F687A)          | GST-Bro1-V (361-720)F687A        |                 | This study            |
| E829     | pGEX-Bro1-V Comp(F677A)          | GST-Bro1-V (361-720)F677A        |                 | This study            |
| E828     | pGEX-Bro1-V Comp(D680A, L681A)   | GST-Bro1-V (361-720)D680A, L681A |                 | This study            |
| E838     | pGEX-Rim20 V                     | GST-Rim20-V(330-661)             |                 | This study            |
| E842     | pGEX-Rim20 V(F623A)              | GST-Rim20 V(330-661, F623A)      |                 | this study            |
|          | pGST2-Alix (360-702)             | GST-Alix V(360-702)              |                 | Addgene               |
| E813     | pRS316-BRO1                      | Bro1                             | URA3, CEN       | This study            |
| E837     | pRS316-BRO1(F687A)               | Bro1(F687A)                      | URA3, CEN       | this study            |
| E846     | pRS316-BRO1myc                   | Bro1-myc                         | URA3, CEN       | This study            |
| E851     | pRS316-BRO1(F687A)myc            | Bro1(F687A)-myc                  | URA3, CEN       | This study            |
| E847     | pRS315-RIM20                     | Rim20                            | LEU2, CEN       | This study            |
| E854     | pRS315-RIM20(F623A)              | Rim20(F623A)                     | LEU2, CEN       | This study            |
| E848     | pRS315-mycRIM20                  | Myc-Rim20                        | LEU2, CEN       | This study            |
| E855     | pRS315-mycRIM20(F623A)           | Myc-Rim20(F623A)                 | LEU2, CEN       | This study            |
| E860     | LRIM101m1HApRS416                | HA-Rim101                        | URA3            | This study            |
| E861     | pRS416-HA-RIM101(Y620A, P621A)   | HA-Rim101(Y620A, P621A)          | URA3            | This study            |

## Supplementary References

**Hayashi M, Fukuzawa T, Sorimachi H, Maeda T.** 2005. Constitutive activation of the pH-responsive Rim101 pathway in yeast mutants defective in late steps of the MVB/ESCRT pathway. *Mol Cell Biol* **25**:9478-9490.

**Kimata Y, Iwaki M, Lim CR, Kohno K.** 1997. A novel mutation which enhances the fluorescence of green fluorescent protein at high temperatures. *Biochem Biophys Res Commun* **232**:69-73.

**Kimura Y, Yashiroda H, Kudo T, Koitabashi S, Murata S, Kakizuka A, Tanaka K.** 2009. An inhibitor of a deubiquitinating enzyme regulates ubiquitin homeostasis. *Cell* **137**:549-559.

**Kimura Y, Kawawaki J, Kakiyama Y, Shimoda A, Tanaka K.** 2014. The ESCRT-III adaptor protein Bro1 controls functions of regulator for free ubiquitin chains 1 (Rfu1) in ubiquitin homeostasis. *J Biol Chem* **289**:21760-21769.
